# Supplementary material for: QM/MD studies on graphene growth from small islands on the Ni(111) surface
Source: Royal Society of Chemistry journal article supplement (doi:10.1039/c5nr07680c), 2016-01-01
Supplement: c5nr07680c3.pdf [file c5nr07680c3.pdf]

## Supporting Information

### **QM/MD studies on graphene growth from small islands on Ni(111) surface**

Menggai Jiao,<sup>a,c</sup> Wei Song,<sup>b</sup> Hu-Jun Qian,<sup>d</sup> Ying Wang,<sup>\*a</sup> Zhijian Wu,<sup>\*a</sup> Stephan Irle<sup>e</sup>  
and Keiji Morokuma<sup>f</sup>

<sup>a</sup>State Key Laboratory of Rare Earth Resource Utilization, Changchun Institute of Applied Chemistry, Chinese Academy of Sciences, Changchun 130022, China

<sup>b</sup>Physics and Electronic Engineering Department, Xinxiang University, Xinxiang, 453003, China

<sup>c</sup>University of Chinese Academy of Sciences, Beijing 100049, China

<sup>d</sup>State Key Laboratory of Theoretical and Computational Chemistry, Institute of Theoretical Chemistry, Jilin University, Changchun 130023, China

<sup>e</sup>Institute of Transformative Bio-Molecules (WPI-ITbM) and Department of Chemistry, Graduate School of Science, Nagoya University, Nagoya 464-8602, Japan

<sup>f</sup>Fukui Institute for Fundamental Chemistry, Kyoto University, Kyoto 606-8103, Japan

\*E-mail: ywang\_2012@ciac.ac.cn; zjwu@ciac.ac.cn

## Contents

### 1. Extended Discussion

### 2. References

#### Movies:

There are two movies showing simulation process and they are provided in separate files.

**Movie S1.** Evolution of QM/MD simulations of the growth of graphene from one  $C_{13}$  on Ni(111) surface for trajectory  $D@C_{13}$ . Brown and cyan spheres represent Ni and C atoms, respectively. The preexisting  $C_{13}$  is highlighted in blue.

**Movie S2.** Evolution of QM/MD simulations of the growth of graphene from two  $C_{13}$  species on Ni(111) surface for trajectory  $C@2C_{13}$ . Color conventions as in Movie S1. The preexisting two  $C_{13}$  species are highlighted in blue and purple, respectively.

#### Figures:

**Fig. S1** Optimized geometries of  $C_{13}$ -G and  $C_{13}$ -H on Ni(111) surface.

**Fig. S2** Final structures of trajectories A-J@ $C_{13}$  following 400 ps QM/MD simulation for the Ni(111)+ $C_{13}$  system. Brown and cyan spheres represent Ni and C atoms, respectively. The preexisting  $C_{13}$  is highlighted in blue.

**Fig. S3** Final structures of trajectories A-J@ $2C_{13}$  following 350 ps QM/MD simulation for the Ni(111)+ $2C_{13}$  system. Color conventions as in Fig. S1. The preexisting two  $C_{13}$  species are highlighted in blue and purple, respectively.

**Fig. S4** Average polygonal carbon ring populations formed during graphene growth from (a) Ni(111)+ $C_{13}$  and (b) Ni(111)+ $2C_{13}$  systems.

**Fig. S5** Averaged  $\delta$  value of (a) the  $C_{13}$  clusters and (b) the nickel catalyst in Ni(111)+ $C_{13}$  and Ni(111)+ $2C_{13}$  systems, respectively.

**Fig. S6** Total Mermin free energy as a function of simulation time in Ni(111)+ $2C_{13}$  system.

#### Tables:

**Table S1.** Formation energy of  $C_{13}$ -G and  $C_{13}$ -H on Ni(111) surface.

**Table S2.** The effect of  $T_e$  on the crystalline features of the Ni(111) surface.

## 1. Extended Discussion

To investigate the high mobility of C<sub>13</sub> and the nickel catalyst, the Lindemann index,  $\delta$ ,<sup>1</sup> was calculated according to the following equation,

$$\delta = \frac{1}{N(N-1)} \sum_{i < j} \frac{\sqrt{\langle r_{ij}^2 \rangle_T - \langle r_{ij} \rangle_T^2}}{\langle r_{ij} \rangle_T}$$

where N is the number of atoms in the relevant system,  $r_{ij}$  is the instantaneous distance between atoms i and j, and the brackets denote thermal averaging over a finite interval of time. The Lindemann index has been used on a number of occasions as an accurate probe of the catalyst phase in the context of the nucleation and growth of graphene and carbon nanotube.<sup>2-5</sup> It is typically accepted that  $\delta = 0.1$  marks the transition between the solid and liquid phases.<sup>6</sup> Fig. S5 shows that in the two systems both the carbon clusters and the nickel catalyst rapidly undergo a solid to liquid phase transition upon thermal annealing, as indicated by the rapid increase of  $\delta$ . Thus, they exhibit significantly high mobility, which is responsible for the quick diffusion and further aggregation of carbon clusters.

## 2. References

1. F. A. Lindemann, *Phys. Z.*, 1910, **11**, 609-612.
2. F. Ding, A. Rosén, S. Curtarolo and K. Bolton, *Appl. Phys. Lett.*, 2006, **88**, 133110.
3. A. J. Page, H. Yamane, Y. Ohta, S. Irle and K. Morokuma, *J. Am. Chem. Soc.*, 2010, **132**, 15699-15707.
4. M. Jiao, K. Li, W. Guan, Y. Wang, Z. Wu, A. Page and K. Morokuma, *Sci. Rep.*, 2015, **5**, 12091.
5. H.-B. Li, A. J. Page, C. Hettich, B. Aradi, C. Kohler, T. Frauenheim, S. Irle and K. Morokuma, *Chem. Sci.*, 2014, **5**, 3493-3500.
6. Y. Zhou, M. Karplus, K. D. Ball and R. S. Berry, *J. Chem. Phys.*, 2002, **116**, 2323-2329.

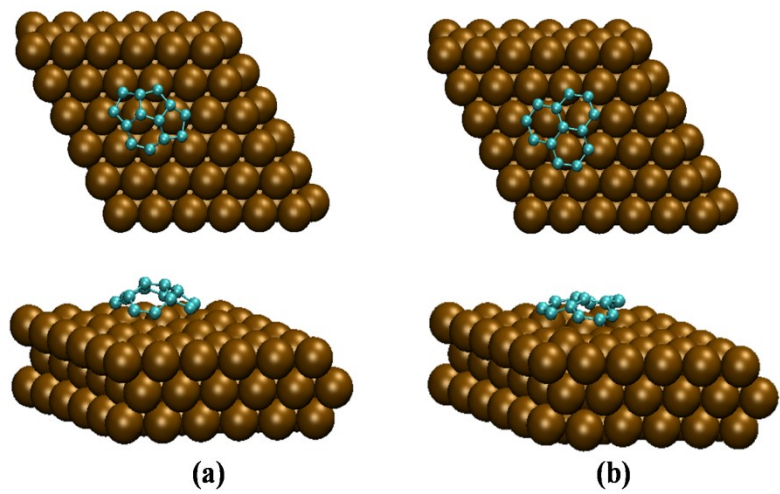

**Fig. S1** Optimized geometries of C<sub>13</sub>-G and C<sub>13</sub>-H on Ni(111) surface.

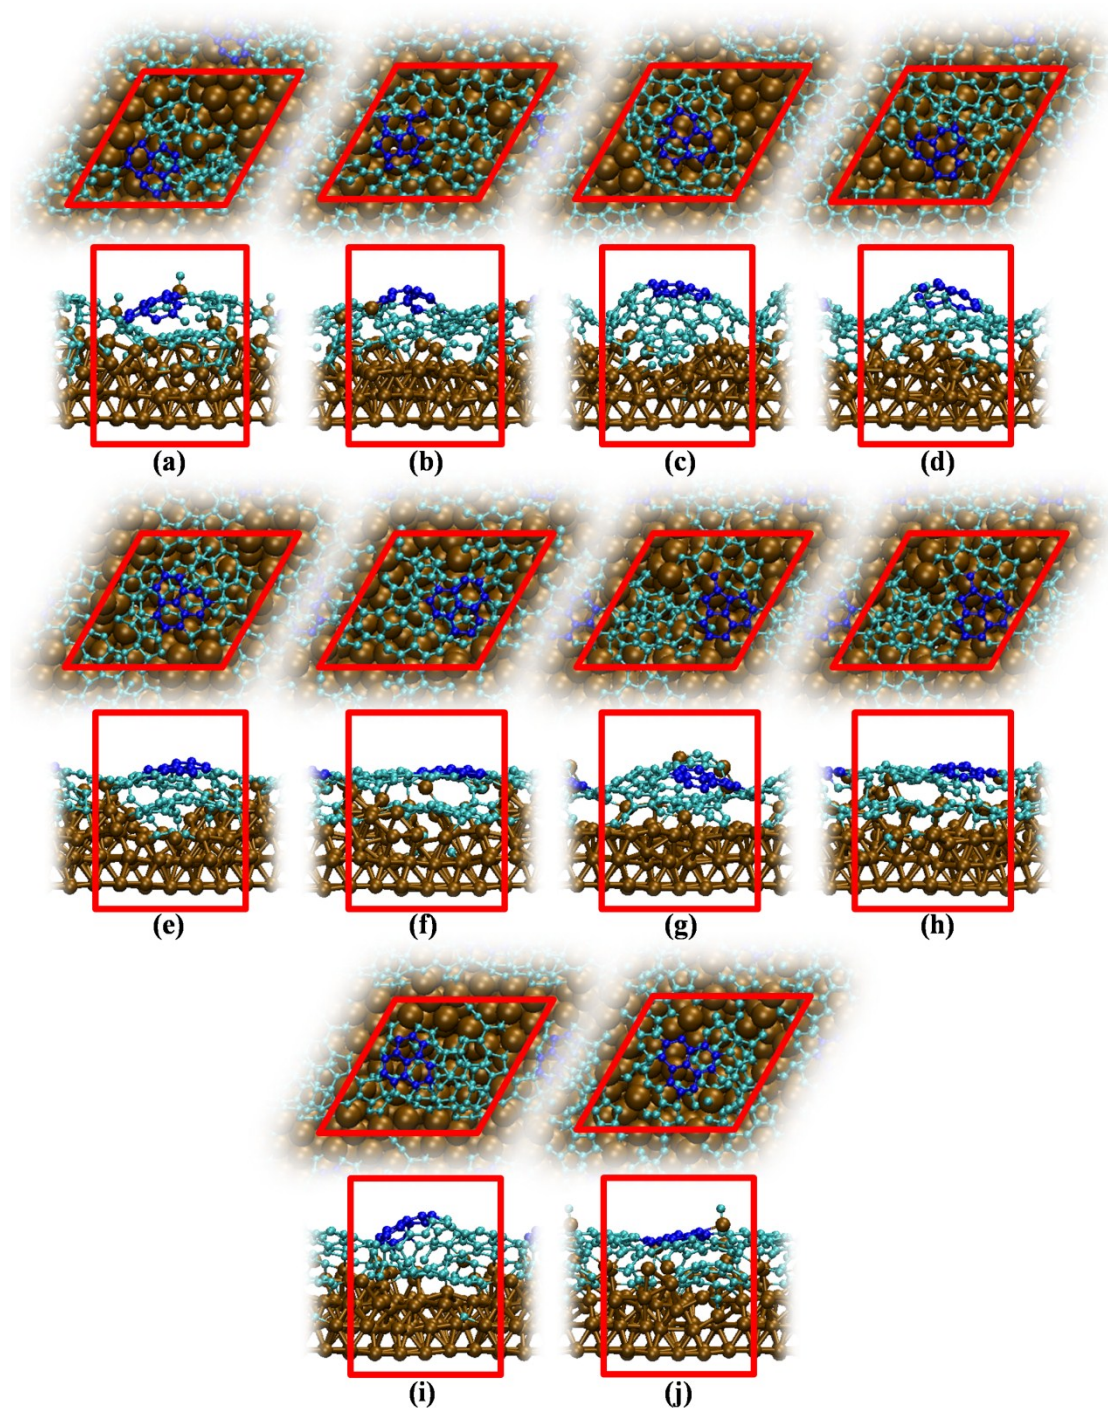

**Fig. S2** Final structures of trajectories A-J@C<sub>13</sub> following 400 ps QM/MD simulation for the Ni(111)+C<sub>13</sub> system. Brown and cyan spheres represent Ni and C atoms, respectively. The preexisting C<sub>13</sub> is highlighted in blue.

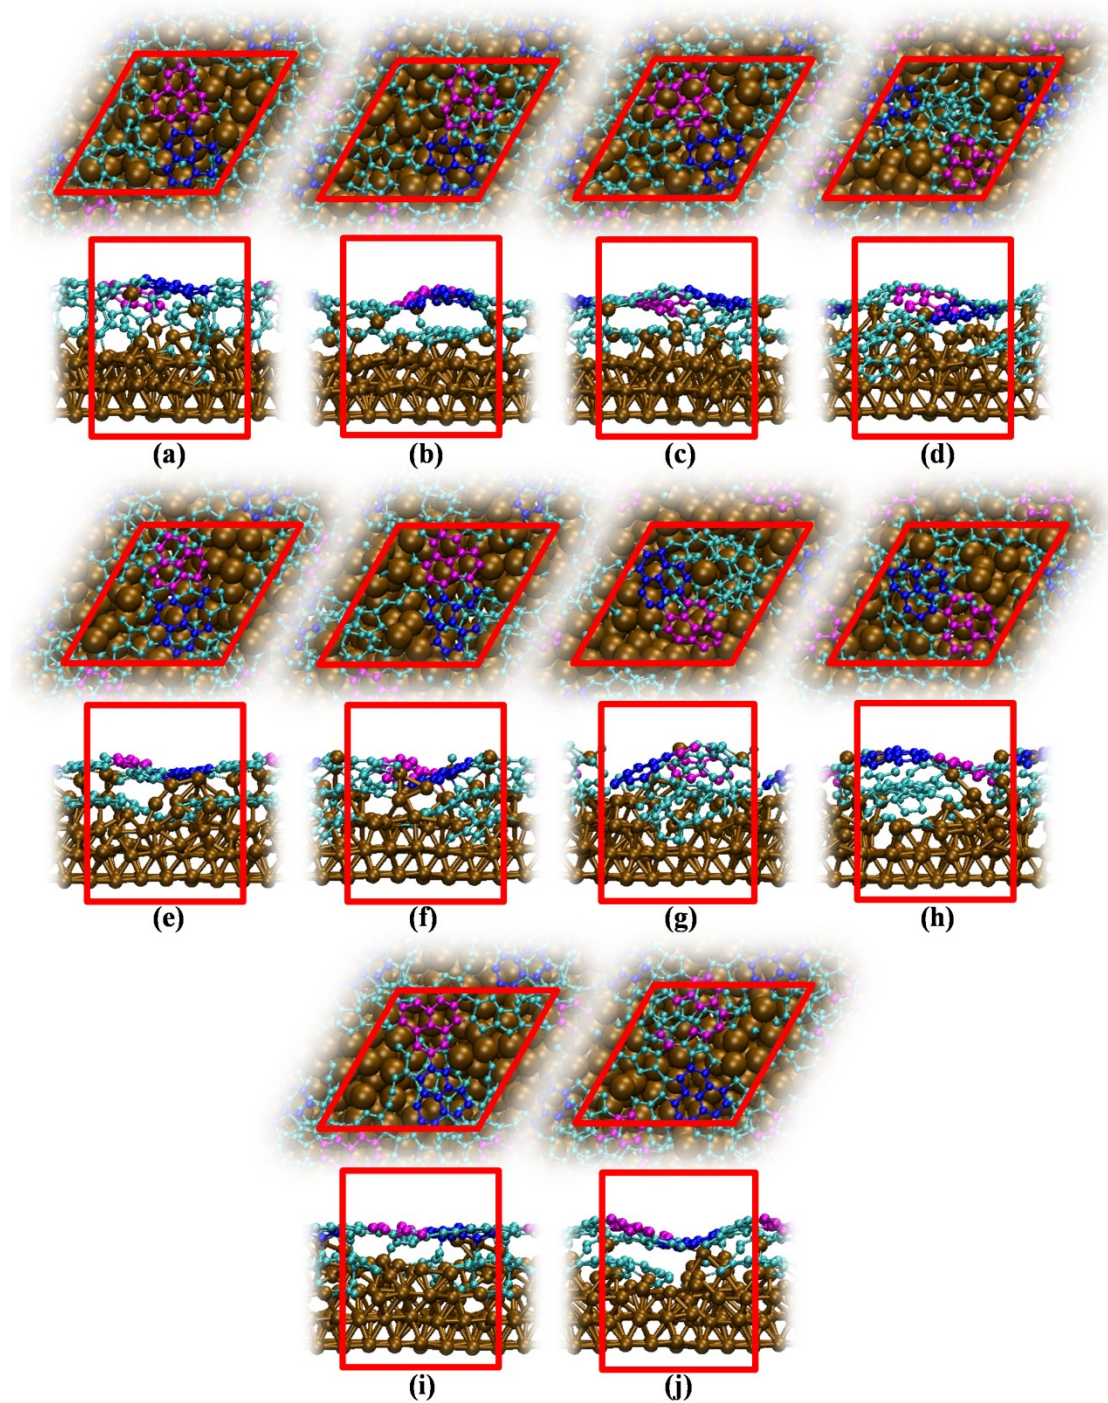

**Fig. S3** Final structures of trajectories A-J@2C<sub>13</sub> following 350 ps QM/MD simulation for the Ni(111)+2C<sub>13</sub> system. Color conventions as in Fig. S1. The preexisting two C<sub>13</sub> species are highlighted in blue and purple, respectively.

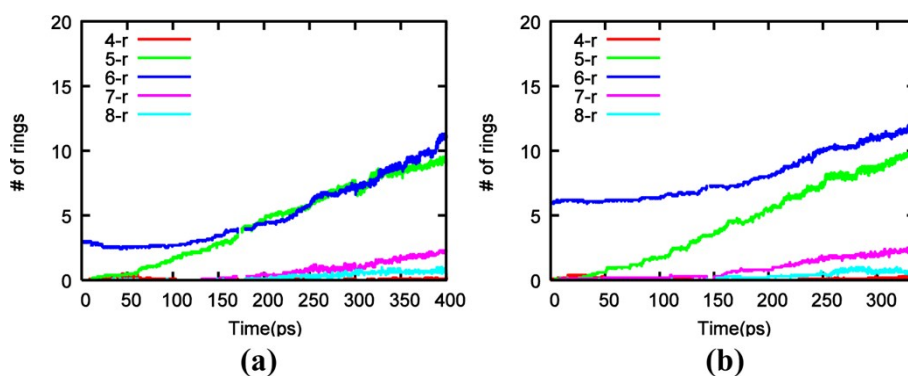

**Fig. S4** Average polygonal carbon ring populations formed during graphene growth from (a) Ni(111)+C<sub>13</sub> and (b) Ni(111)+2C<sub>13</sub> systems.

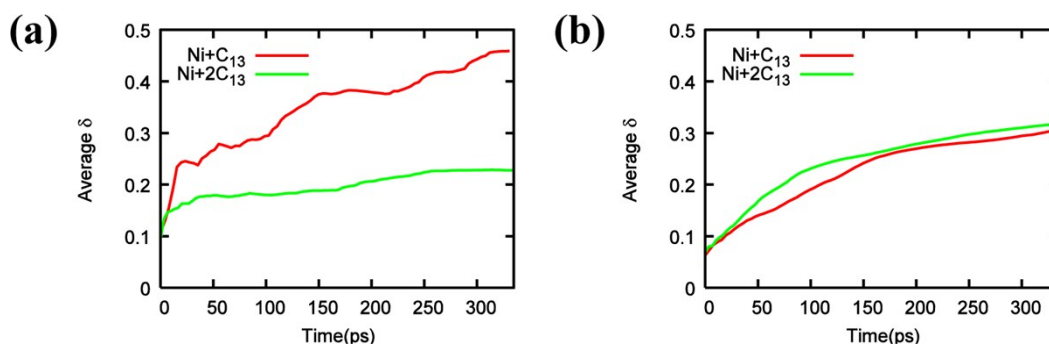

**Fig. S5** Averaged  $\delta$  value of (a) the C<sub>13</sub> clusters and (b) the nickel catalyst in Ni(111)+C<sub>13</sub> and Ni(111)+2C<sub>13</sub> systems, respectively.

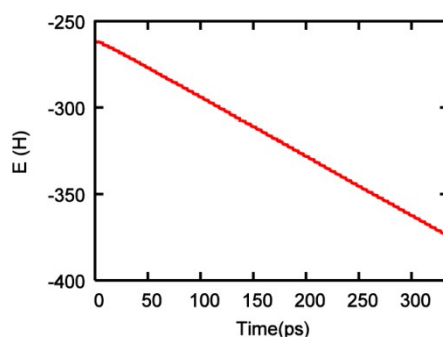

**Fig. S6** Total Mermin free energy as a function of simulation time in Ni(111)+2C<sub>13</sub> system.

**Table S1.** Formation energy of C<sub>13</sub>-G and C<sub>13</sub>-H on Ni(111) surface.

|                  | C <sub>13</sub> -G | C <sub>13</sub> -H |
|------------------|--------------------|--------------------|
| DFT <sup>a</sup> | 10.55              | 12.52              |
| SCC-DFTB         | 14.11              | 15.85              |

<sup>a</sup> Ref. 22**Table S2.** The effect of  $T_e$  on the crystalline features of the Ni(111) surface.

| $T_e$ (K) | a (Å)  | b (Å)  | c (Å) | Interlayer distance (Å) | Ni-Ni bond length (Å) |
|-----------|--------|--------|-------|-------------------------|-----------------------|
| initial   | 14.951 | 14.951 | 6.104 | 2.035                   | 2.492                 |
| 500       | 14.934 | 14.934 | 6.442 | 2.147                   | 2.489                 |
| 1000      | 14.934 | 14.934 | 6.454 | 2.151                   | 2.489                 |
| 1180      | 14.934 | 14.934 | 6.457 | 2.152                   | 2.489                 |
| 1500      | 14.934 | 14.934 | 6.464 | 2.155                   | 2.489                 |
| 2000      | 14.934 | 14.934 | 6.480 | 2.160                   | 2.489                 |
| 3000      | 14.934 | 14.934 | 6.520 | 2.173                   | 2.489                 |
| 5000      | 14.934 | 14.934 | 6.606 | 2.202                   | 2.489                 |
| 6000      | 14.854 | 14.894 | 8.032 | 2.677                   | 2.478/2.482           |
| 7000      | 14.926 | 14.855 | 7.081 | 2.360                   | 2.488/2.476           |
| 10000     | 14.995 | 14.827 | 9.295 | 3.098                   | 2.499/2.471           |
